# Supplementary material for: Reconstruction of drought and long-rain chronologies since the 17th century in Central Japan using intra-annual tree-ring oxygen isotope ratios and documentary records
Source: Copernicus journal article supplement (doi:10.5194/egusphere-2024-627), 2024-03-21
Supplement: Supplementary file 1 [file egusphere-2024-627-supplement.pdf]

## Supplementary information

Table S1 List of Town/City histories used in this study.

5

| No. | Title                            | North longitude | East latitude | Year of publication |
|-----|----------------------------------|-----------------|---------------|---------------------|
| 1   | Tajimi City history              | 35° 20'         | 137° 08'      | 1980                |
| 2   | Kasahara Town history            | 35° 18'         | 137° 10'      | 1993                |
| 3   | Toki City history                | 35° 21'         | 137° 11'      | 1971                |
| 4   | Tumaki Village history           | 35° 19'         | 137° 11'      | 1931                |
| 5   | Mizunami City history            | 35° 22'         | 137° 15'      | 1974                |
| 6   | Ena City history                 | 35° 27'         | 137° 25'      | 1989                |
| 7   | Iwamura Town history             | 35° 22'         | 137° 26'      | 1961                |
| 8   | Kamiyahagi Town history          | 35° 18'         | 137° 30'      | 2008                |
| 9   | Takenami Town history            | 35° 27'         | 137° 20'      | 1993                |
| 10  | Nakanoho Town history            | 35° 31'         | 137° 18'      | 1968                |
| 11  | Yamaoka Town history             | 35° 21'         | 137° 23'      | 1984                |
| 12  | Nakatsugawa City history         | 35° 29'         | 137° 30'      | 1988                |
| 13  | Hirukawa Village history         | 35° 31'         | 137° 23'      | 1974                |
| 14  | Kawakami Village history         | 35° 37'         | 137° 30'      | 1983                |
| 15  | Sakashita Town history           | 35° 34'         | 137° 32'      | 2005                |
| 16  | Fukuoka Town history             | 35° 34'         | 137° 27'      | 1992                |
| 17  | Tukechi Town history             | 35° 40'         | 137° 26'      | 1974                |
| 18  | Kani City history                | 35° 26'         | 137° 04'      | 2010                |
| 19  | Mitake Town history              | 35° 26'         | 137° 08'      | 1992                |
| 20  | Gifu Prefecture disaster history | 35° 26'         | 136° 46'      | 1996                |

Table S2 Total number of disaster descriptions in a total of twenty titles of Town/City history in the Tono area for each of eight disaster types for each year in 1601–1900.

|      | Long rain | Drought | Flood | Heavy rain | Poor harvest | Famine | Heavy wind | Damage from pests |
|------|-----------|---------|-------|------------|--------------|--------|------------|-------------------|
| 1601 | 0         | 0       | 0     | 0          | 0            | 0      | 0          | 0                 |
| 1602 | 0         | 0       | 0     | 0          | 0            | 0      | 0          | 0                 |
| 1603 | 0         | 0       | 0     | 0          | 0            | 0      | 0          | 0                 |
| 1604 | 0         | 0       | 0     | 0          | 0            | 0      | 0          | 0                 |
| 1605 | 0         | 0       | 0     | 0          | 0            | 0      | 0          | 0                 |
| 1606 | 0         | 0       | 0     | 0          | 0            | 0      | 0          | 0                 |
| 1607 | 0         | 0       | 0     | 0          | 0            | 0      | 0          | 0                 |
| 1608 | 0         | 0       | 1     | 0          | 0            | 0      | 0          | 0                 |
| 1609 | 0         | 0       | 0     | 0          | 0            | 0      | 0          | 0                 |
| 1610 | 0         | 0       | 2     | 0          | 0            | 0      | 0          | 0                 |
| 1611 | 0         | 0       | 0     | 0          | 0            | 0      | 0          | 0                 |
| 1612 | 0         | 0       | 0     | 0          | 0            | 0      | 0          | 0                 |
| 1613 | 0         | 0       | 0     | 0          | 0            | 0      | 0          | 0                 |
| 1614 | 0         | 0       | 1     | 0          | 0            | 0      | 0          | 0                 |
| 1615 | 0         | 0       | 0     | 0          | 1            | 1      | 0          | 0                 |
| 1616 | 0         | 0       | 0     | 0          | 0            | 0      | 0          | 0                 |
| 1617 | 0         | 0       | 1     | 0          | 1            | 0      | 0          | 0                 |
| 1618 | 0         | 0       | 0     | 0          | 0            | 0      | 0          | 0                 |
| 1619 | 0         | 0       | 0     | 0          | 0            | 0      | 0          | 0                 |
| 1620 | 1         | 0       | 0     | 0          | 0            | 1      | 0          | 0                 |
| 1621 | 0         | 0       | 0     | 0          | 0            | 0      | 0          | 0                 |
| 1622 | 0         | 0       | 0     | 0          | 1            | 0      | 0          | 0                 |
| 1623 | 0         | 0       | 0     | 0          | 0            | 0      | 0          | 0                 |
| 1624 | 0         | 0       | 0     | 0          | 0            | 0      | 0          | 0                 |
| 1625 | 0         | 0       | 0     | 0          | 0            | 0      | 0          | 0                 |
| 1626 | 0         | 0       | 0     | 0          | 0            | 0      | 0          | 0                 |
| 1627 | 0         | 1       | 0     | 0          | 0            | 0      | 0          | 0                 |
| 1628 | 0         | 0       | 0     | 0          | 0            | 0      | 0          | 0                 |
| 1629 | 0         | 0       | 2     | 0          | 0            | 0      | 0          | 0                 |
| 1630 | 0         | 0       | 0     | 0          | 0            | 1      | 0          | 0                 |
| 1631 | 0         | 0       | 0     | 0          | 0            | 1      | 0          | 0                 |
| 1632 | 0         | 0       | 0     | 0          | 0            | 0      | 0          | 0                 |
| 1633 | 0         | 0       | 0     | 0          | 0            | 0      | 0          | 0                 |
| 1634 | 0         | 0       | 0     | 0          | 0            | 0      | 0          | 0                 |
| 1635 | 0         | 0       | 0     | 0          | 0            | 0      | 0          | 0                 |
| 1636 | 0         | 0       | 0     | 0          | 0            | 0      | 0          | 0                 |
| 1637 | 0         | 0       | 0     | 0          | 0            | 0      | 0          | 0                 |
| 1638 | 0         | 0       | 1     | 0          | 0            | 0      | 0          | 0                 |
| 1639 | 0         | 0       | 0     | 0          | 0            | 0      | 0          | 0                 |
| 1640 | 0         | 0       | 0     | 0          | 1            | 1      | 0          | 0                 |
| 1641 | 0         | 5       | 0     | 0          | 0            | 1      | 0          | 0                 |
| 1642 | 1         | 0       | 0     | 0          | 2            | 6      | 0          | 0                 |
| 1643 | 0         | 0       | 0     | 0          | 0            | 0      | 0          | 0                 |
| 1644 | 0         | 0       | 0     | 0          | 0            | 0      | 0          | 0                 |
| 1645 | 0         | 0       | 0     | 0          | 0            | 0      | 0          | 0                 |
| 1646 | 0         | 0       | 0     | 0          | 0            | 0      | 0          | 0                 |
| 1647 | 0         | 0       | 0     | 0          | 0            | 0      | 0          | 0                 |
| 1648 | 0         | 0       | 1     | 1          | 0            | 0      | 0          | 0                 |
| 1649 | 0         | 0       | 0     | 0          | 0            | 0      | 0          | 0                 |
| 1650 | 0         | 0       | 5     | 0          | 0            | 0      | 0          | 0                 |
| 1651 | 0         | 0       | 0     | 0          | 0            | 0      | 0          | 0                 |
| 1652 | 0         | 0       | 0     | 0          | 0            | 0      | 0          | 0                 |
| 1653 | 0         | 0       | 0     | 0          | 0            | 0      | 0          | 0                 |
| 1654 | 0         | 0       | 0     | 0          | 0            | 0      | 0          | 0                 |
| 1655 | 0         | 0       | 0     | 0          | 0            | 0      | 0          | 0                 |
| 1656 | 0         | 0       | 1     | 0          | 0            | 0      | 0          | 0                 |

|      |   |   |   |   |   |   |   |   |
|------|---|---|---|---|---|---|---|---|
| 1657 | 0 | 0 | 0 | 0 | 0 | 0 | 0 | 0 |
| 1658 | 0 | 0 | 0 | 0 | 0 | 0 | 0 | 0 |
| 1659 | 0 | 0 | 0 | 0 | 0 | 0 | 0 | 0 |
| 1660 | 0 | 0 | 1 | 0 | 0 | 0 | 0 | 0 |
| 1661 | 0 | 0 | 1 | 0 | 0 | 0 | 0 | 0 |
| 1662 | 0 | 0 | 0 | 0 | 0 | 0 | 0 | 0 |
| 1663 | 0 | 4 | 0 | 0 | 0 | 1 | 0 | 0 |
| 1664 | 0 | 0 | 0 | 0 | 0 | 0 | 0 | 0 |
| 1665 | 1 | 0 | 2 | 0 | 0 | 0 | 0 | 0 |
| 1666 | 0 | 0 | 1 | 0 | 0 | 0 | 0 | 0 |
| 1667 | 0 | 0 | 0 | 0 | 0 | 0 | 0 | 0 |
| 1668 | 0 | 1 | 1 | 0 | 0 | 0 | 0 | 0 |
| 1669 | 0 | 0 | 0 | 0 | 0 | 0 | 0 | 0 |
| 1670 | 0 | 0 | 0 | 0 | 0 | 0 | 0 | 0 |
| 1671 | 0 | 0 | 0 | 0 | 0 | 0 | 0 | 0 |
| 1672 | 0 | 0 | 0 | 0 | 0 | 0 | 0 | 0 |
| 1673 | 0 | 0 | 0 | 0 | 0 | 1 | 0 | 0 |
| 1674 | 0 | 1 | 1 | 0 | 1 | 1 | 0 | 0 |
| 1675 | 1 | 0 | 0 | 0 | 1 | 5 | 0 | 0 |
| 1676 | 0 | 0 | 0 | 1 | 0 | 0 | 0 | 0 |
| 1677 | 0 | 0 | 0 | 0 | 0 | 0 | 0 | 0 |
| 1678 | 0 | 0 | 2 | 0 | 0 | 0 | 0 | 0 |
| 1679 | 0 | 0 | 0 | 0 | 0 | 0 | 0 | 0 |
| 1680 | 1 | 0 | 2 | 1 | 0 | 0 | 0 | 3 |
| 1681 | 0 | 0 | 0 | 0 | 1 | 2 | 0 | 0 |
| 1682 | 0 | 0 | 0 | 0 | 0 | 1 | 0 | 0 |
| 1683 | 0 | 0 | 0 | 0 | 0 | 0 | 0 | 0 |
| 1684 | 0 | 1 | 0 | 0 | 0 | 0 | 0 | 0 |
| 1685 | 0 | 0 | 1 | 0 | 0 | 0 | 0 | 0 |
| 1686 | 0 | 0 | 0 | 0 | 0 | 0 | 0 | 0 |
| 1687 | 0 | 0 | 3 | 0 | 0 | 0 | 0 | 0 |
| 1688 | 0 | 0 | 0 | 0 | 0 | 0 | 0 | 0 |
| 1689 | 0 | 0 | 2 | 0 | 0 | 0 | 0 | 0 |
| 1690 | 0 | 0 | 0 | 0 | 0 | 0 | 0 | 0 |
| 1691 | 0 | 0 | 1 | 0 | 1 | 1 | 0 | 0 |
| 1692 | 0 | 0 | 1 | 0 | 0 | 0 | 0 | 0 |
| 1693 | 0 | 1 | 0 | 0 | 0 | 0 | 0 | 0 |
| 1694 | 0 | 0 | 0 | 0 | 0 | 0 | 0 | 0 |
| 1695 | 0 | 0 | 0 | 0 | 0 | 0 | 0 | 0 |
| 1696 | 0 | 0 | 0 | 0 | 0 | 0 | 0 | 0 |
| 1697 | 0 | 0 | 0 | 0 | 0 | 0 | 0 | 0 |
| 1698 | 0 | 0 | 1 | 0 | 0 | 0 | 0 | 0 |
| 1699 | 0 | 0 | 1 | 0 | 0 | 0 | 0 | 0 |
| 1700 | 1 | 0 | 0 | 0 | 0 | 0 | 0 | 0 |
| 1701 | 0 | 0 | 1 | 0 | 0 | 0 | 0 | 0 |
| 1702 | 0 | 0 | 0 | 0 | 0 | 0 | 0 | 0 |
| 1703 | 0 | 0 | 0 | 0 | 1 | 0 | 0 | 0 |
| 1704 | 0 | 0 | 0 | 0 | 0 | 0 | 0 | 0 |
| 1705 | 0 | 0 | 0 | 0 | 0 | 0 | 0 | 0 |
| 1706 | 0 | 0 | 0 | 0 | 0 | 0 | 0 | 0 |
| 1707 | 0 | 0 | 0 | 0 | 0 | 0 | 0 | 0 |
| 1708 | 0 | 0 | 0 | 0 | 0 | 0 | 0 | 0 |
| 1709 | 0 | 1 | 0 | 0 | 0 | 0 | 0 | 0 |
| 1710 | 0 | 1 | 0 | 0 | 0 | 0 | 0 | 0 |
| 1711 | 0 | 0 | 0 | 0 | 0 | 0 | 0 | 0 |
| 1712 | 0 | 0 | 0 | 0 | 0 | 0 | 0 | 0 |
| 1713 | 0 | 0 | 4 | 0 | 0 | 0 | 0 | 0 |
| 1714 | 0 | 0 | 0 | 0 | 0 | 0 | 0 | 0 |
| 1715 | 0 | 0 | 2 | 0 | 0 | 0 | 0 | 0 |
| 1716 | 0 | 0 | 2 | 0 | 1 | 0 | 0 | 0 |
| 1717 | 0 | 0 | 0 | 0 | 0 | 0 | 0 | 0 |
| 1718 | 0 | 2 | 0 | 0 | 0 | 0 | 0 | 0 |

|      |   |   |   |   |   |   |   |   |
|------|---|---|---|---|---|---|---|---|
| 1719 | 0 | 0 | 0 | 0 | 0 | 0 | 0 | 0 |
| 1720 | 0 | 0 | 0 | 0 | 0 | 0 | 0 | 0 |
| 1721 | 0 | 0 | 0 | 0 | 0 | 0 | 0 | 0 |
| 1722 | 0 | 0 | 0 | 0 | 0 | 0 | 0 | 0 |
| 1723 | 0 | 0 | 1 | 1 | 0 | 0 | 0 | 0 |
| 1724 | 0 | 1 | 1 | 0 | 0 | 0 | 0 | 0 |
| 1725 | 0 | 1 | 1 | 0 | 0 | 0 | 0 | 0 |
| 1726 | 0 | 0 | 0 | 0 | 0 | 0 | 0 | 0 |
| 1727 | 0 | 0 | 0 | 0 | 0 | 0 | 0 | 0 |
| 1728 | 1 | 0 | 0 | 0 | 2 | 0 | 0 | 0 |
| 1729 | 0 | 0 | 0 | 0 | 0 | 0 | 0 | 0 |
| 1730 | 0 | 0 | 0 | 0 | 1 | 0 | 0 | 0 |
| 1731 | 0 | 0 | 2 | 0 | 1 | 1 | 0 | 0 |
| 1732 | 1 | 0 | 0 | 0 | 1 | 2 | 0 | 2 |
| 1733 | 0 | 0 | 0 | 1 | 0 | 2 | 0 | 0 |
| 1734 | 0 | 0 | 0 | 0 | 0 | 0 | 0 | 0 |
| 1735 | 0 | 0 | 0 | 0 | 0 | 0 | 0 | 0 |
| 1736 | 0 | 0 | 1 | 0 | 0 | 0 | 0 | 0 |
| 1737 | 0 | 0 | 0 | 0 | 0 | 0 | 0 | 0 |
| 1738 | 1 | 0 | 0 | 0 | 0 | 0 | 0 | 0 |
| 1739 | 0 | 0 | 0 | 0 | 0 | 0 | 0 | 0 |
| 1740 | 0 | 0 | 0 | 0 | 0 | 0 | 1 | 0 |
| 1741 | 0 | 0 | 1 | 0 | 0 | 0 | 0 | 0 |
| 1742 | 0 | 0 | 1 | 0 | 0 | 0 | 0 | 0 |
| 1743 | 0 | 0 | 0 | 0 | 0 | 0 | 0 | 0 |
| 1744 | 0 | 1 | 0 | 0 | 0 | 0 | 0 | 0 |
| 1745 | 0 | 1 | 0 | 0 | 1 | 0 | 0 | 0 |
| 1746 | 0 | 0 | 0 | 0 | 0 | 0 | 0 | 0 |
| 1747 | 0 | 1 | 0 | 0 | 0 | 0 | 0 | 0 |
| 1748 | 0 | 0 | 0 | 0 | 0 | 0 | 0 | 0 |
| 1749 | 0 | 0 | 0 | 0 | 0 | 0 | 0 | 0 |
| 1750 | 0 | 0 | 0 | 0 | 1 | 0 | 0 | 0 |
| 1751 | 0 | 0 | 2 | 1 | 0 | 0 | 0 | 0 |
| 1752 | 0 | 0 | 0 | 1 | 0 | 0 | 0 | 0 |
| 1753 | 0 | 0 | 1 | 0 | 0 | 0 | 0 | 0 |
| 1754 | 0 | 0 | 1 | 0 | 0 | 0 | 0 | 0 |
| 1755 | 0 | 0 | 0 | 0 | 0 | 0 | 0 | 0 |
| 1756 | 0 | 0 | 1 | 0 | 0 | 0 | 0 | 0 |
| 1757 | 0 | 0 | 4 | 2 | 0 | 0 | 0 | 0 |
| 1758 | 0 | 2 | 0 | 1 | 1 | 0 | 0 | 0 |
| 1759 | 0 | 0 | 0 | 0 | 0 | 1 | 0 | 0 |
| 1760 | 0 | 0 | 0 | 0 | 0 | 0 | 0 | 0 |
| 1761 | 0 | 1 | 0 | 0 | 0 | 0 | 0 | 0 |
| 1762 | 0 | 2 | 0 | 0 | 0 | 1 | 0 | 0 |
| 1763 | 0 | 0 | 0 | 1 | 0 | 0 | 0 | 0 |
| 1764 | 0 | 0 | 0 | 0 | 0 | 0 | 0 | 0 |
| 1765 | 0 | 2 | 2 | 0 | 0 | 1 | 1 | 0 |
| 1766 | 0 | 0 | 1 | 0 | 0 | 0 | 0 | 0 |
| 1767 | 0 | 2 | 1 | 0 | 0 | 0 | 0 | 0 |
| 1768 | 0 | 2 | 0 | 0 | 0 | 0 | 0 | 0 |
| 1769 | 0 | 0 | 0 | 0 | 0 | 1 | 0 | 0 |
| 1770 | 0 | 8 | 0 | 0 | 0 | 1 | 0 | 0 |
| 1771 | 0 | 3 | 0 | 0 | 0 | 0 | 0 | 0 |
| 1772 | 0 | 1 | 0 | 0 | 1 | 0 | 0 | 0 |
| 1773 | 0 | 0 | 0 | 0 | 0 | 0 | 0 | 0 |
| 1774 | 0 | 0 | 0 | 0 | 0 | 0 | 0 | 0 |
| 1775 | 0 | 0 | 1 | 0 | 1 | 0 | 0 | 0 |
| 1776 | 0 | 1 | 1 | 0 | 0 | 0 | 0 | 0 |
| 1777 | 0 | 0 | 0 | 0 | 0 | 0 | 0 | 0 |
| 1778 | 0 | 1 | 0 | 0 | 0 | 0 | 0 | 0 |
| 1779 | 0 | 0 | 2 | 0 | 0 | 0 | 0 | 0 |
| 1780 | 0 | 1 | 0 | 0 | 0 | 0 | 0 | 0 |

|      |   |   |   |   |   |   |   |   |
|------|---|---|---|---|---|---|---|---|
| 1781 | 3 | 0 | 0 | 0 | 0 | 0 | 0 | 0 |
| 1782 | 5 | 0 | 0 | 1 | 0 | 0 | 0 | 0 |
| 1783 | 3 | 0 | 0 | 0 | 2 | 2 | 0 | 0 |
| 1784 | 0 | 1 | 1 | 0 | 3 | 5 | 0 | 0 |
| 1785 | 0 | 2 | 0 | 0 | 0 | 0 | 0 | 0 |
| 1786 | 8 | 0 | 1 | 0 | 6 | 3 | 1 | 0 |
| 1787 | 3 | 0 | 0 | 1 | 6 | 2 | 0 | 0 |
| 1788 | 0 | 0 | 0 | 0 | 2 | 0 | 0 | 0 |
| 1789 | 2 | 0 | 2 | 0 | 2 | 0 | 0 | 0 |
| 1790 | 0 | 4 | 1 | 0 | 0 | 0 | 0 | 0 |
| 1791 | 0 | 1 | 0 | 0 | 1 | 0 | 0 | 0 |
| 1792 | 1 | 0 | 1 | 1 | 0 | 0 | 1 | 0 |
| 1793 | 0 | 1 | 0 | 1 | 0 | 0 | 0 | 0 |
| 1794 | 0 | 4 | 1 | 0 | 0 | 0 | 0 | 0 |
| 1795 | 0 | 0 | 0 | 1 | 0 | 0 | 0 | 0 |
| 1796 | 0 | 0 | 0 | 0 | 1 | 0 | 0 | 0 |
| 1797 | 0 | 4 | 0 | 0 | 0 | 0 | 0 | 0 |
| 1798 | 0 | 0 | 3 | 1 | 0 | 1 | 0 | 0 |
| 1799 | 0 | 1 | 0 | 0 | 0 | 0 | 0 | 0 |
| 1800 | 3 | 0 | 0 | 0 | 0 | 0 | 0 | 0 |
| 1801 | 0 | 0 | 0 | 0 | 0 | 0 | 0 | 0 |
| 1802 | 0 | 0 | 0 | 0 | 0 | 0 | 1 | 0 |
| 1803 | 0 | 0 | 0 | 0 | 0 | 0 | 0 | 0 |
| 1804 | 0 | 0 | 2 | 0 | 0 | 0 | 0 | 0 |
| 1805 | 0 | 3 | 0 | 0 | 0 | 0 | 0 | 0 |
| 1806 | 0 | 0 | 0 | 0 | 1 | 0 | 0 | 0 |
| 1807 | 0 | 0 | 0 | 0 | 1 | 0 | 2 | 1 |
| 1808 | 1 | 0 | 1 | 1 | 0 | 0 | 0 | 0 |
| 1809 | 0 | 1 | 0 | 0 | 0 | 0 | 0 | 0 |
| 1810 | 0 | 0 | 0 | 0 | 0 | 0 | 0 | 0 |
| 1811 | 0 | 0 | 0 | 0 | 0 | 0 | 0 | 0 |
| 1812 | 0 | 0 | 0 | 0 | 0 | 0 | 0 | 0 |
| 1813 | 0 | 1 | 0 | 0 | 0 | 0 | 0 | 0 |
| 1814 | 0 | 1 | 0 | 1 | 0 | 1 | 0 | 0 |
| 1815 | 0 | 0 | 2 | 0 | 0 | 0 | 0 | 0 |
| 1816 | 0 | 0 | 0 | 1 | 1 | 0 | 0 | 0 |
| 1817 | 0 | 2 | 0 | 0 | 0 | 0 | 0 | 1 |
| 1818 | 0 | 4 | 0 | 0 | 0 | 0 | 0 | 0 |
| 1819 | 0 | 0 | 0 | 0 | 0 | 0 | 0 | 0 |
| 1820 | 0 | 0 | 0 | 0 | 0 | 0 | 0 | 0 |
| 1821 | 0 | 2 | 0 | 0 | 1 | 0 | 1 | 0 |
| 1822 | 0 | 1 | 1 | 2 | 0 | 0 | 0 | 0 |
| 1823 | 0 | 1 | 0 | 1 | 0 | 0 | 1 | 0 |
| 1824 | 0 | 0 | 0 | 0 | 0 | 0 | 0 | 0 |
| 1825 | 1 | 0 | 0 | 0 | 2 | 0 | 0 | 3 |
| 1826 | 0 | 0 | 0 | 1 | 0 | 0 | 0 | 0 |
| 1827 | 0 | 1 | 0 | 0 | 0 | 0 | 0 | 0 |
| 1828 | 0 | 0 | 0 | 1 | 0 | 0 | 0 | 0 |
| 1829 | 1 | 0 | 0 | 0 | 0 | 0 | 0 | 0 |
| 1830 | 0 | 0 | 0 | 0 | 0 | 1 | 0 | 0 |
| 1831 | 0 | 0 | 0 | 0 | 1 | 0 | 0 | 0 |
| 1832 | 0 | 4 | 0 | 0 | 4 | 2 | 0 | 0 |
| 1833 | 2 | 1 | 0 | 0 | 2 | 4 | 0 | 1 |
| 1834 | 0 | 0 | 0 | 0 | 2 | 3 | 0 | 0 |
| 1835 | 2 | 0 | 1 | 0 | 3 | 1 | 0 | 0 |
| 1836 | 5 | 0 | 0 | 0 | 6 | 7 | 1 | 3 |
| 1837 | 0 | 1 | 2 | 0 | 0 | 3 | 6 | 0 |
| 1838 | 0 | 1 | 0 | 0 | 1 | 0 | 0 | 0 |
| 1839 | 0 | 1 | 0 | 0 | 1 | 0 | 0 | 1 |
| 1840 | 0 | 1 | 0 | 1 | 0 | 0 | 0 | 0 |
| 1841 | 0 | 1 | 1 | 0 | 2 | 1 | 0 | 1 |
| 1842 | 0 | 0 | 1 | 0 | 0 | 0 | 0 | 0 |

|      |   |   |   |   |   |   |   |   |
|------|---|---|---|---|---|---|---|---|
| 1843 | 0 | 0 | 0 | 0 | 0 | 0 | 1 | 0 |
| 1844 | 0 | 1 | 0 | 0 | 0 | 0 | 0 | 0 |
| 1845 | 0 | 0 | 0 | 0 | 0 | 0 | 0 | 0 |
| 1846 | 0 | 0 | 0 | 0 | 0 | 0 | 0 | 0 |
| 1847 | 0 | 0 | 0 | 0 | 0 | 0 | 0 | 0 |
| 1848 | 0 | 1 | 2 | 0 | 0 | 0 | 0 | 0 |
| 1849 | 0 | 0 | 0 | 0 | 0 | 0 | 0 | 0 |
| 1850 | 0 | 0 | 3 | 0 | 1 | 1 | 2 | 0 |
| 1851 | 0 | 2 | 1 | 1 | 0 | 0 | 0 | 0 |
| 1852 | 0 | 2 | 0 | 1 | 0 | 0 | 0 | 0 |
| 1853 | 0 | 5 | 0 | 0 | 0 | 0 | 0 | 0 |
| 1854 | 0 | 0 | 3 | 0 | 1 | 1 | 0 | 0 |
| 1855 | 1 | 1 | 3 | 1 | 1 | 0 | 1 | 0 |
| 1856 | 0 | 2 | 0 | 3 | 1 | 0 | 0 | 0 |
| 1857 | 0 | 0 | 2 | 1 | 0 | 0 | 0 | 0 |
| 1858 | 0 | 0 | 1 | 0 | 0 | 0 | 0 | 1 |
| 1859 | 0 | 0 | 0 | 0 | 0 | 0 | 0 | 0 |
| 1860 | 3 | 0 | 2 | 0 | 2 | 0 | 2 | 0 |
| 1861 | 0 | 1 | 1 | 0 | 0 | 1 | 0 | 0 |
| 1862 | 0 | 0 | 1 | 0 | 0 | 0 | 0 | 0 |
| 1863 | 0 | 1 | 0 | 0 | 0 | 0 | 0 | 0 |
| 1864 | 0 | 0 | 1 | 1 | 0 | 0 | 0 | 0 |
| 1865 | 2 | 0 | 3 | 1 | 1 | 0 | 0 | 0 |
| 1866 | 3 | 1 | 1 | 0 | 3 | 1 | 1 | 0 |
| 1867 | 0 | 1 | 0 | 0 | 0 | 1 | 0 | 0 |
| 1868 | 1 | 0 | 1 | 0 | 1 | 0 | 0 | 0 |
| 1869 | 0 | 0 | 1 | 0 | 1 | 1 | 0 | 0 |
| 1870 | 0 | 0 | 1 | 0 | 0 | 0 | 1 | 0 |
| 1871 | 0 | 0 | 0 | 0 | 0 | 0 | 1 | 0 |
| 1872 | 0 | 0 | 0 | 0 | 0 | 0 | 0 | 0 |
| 1873 | 0 | 0 | 0 | 0 | 0 | 0 | 0 | 0 |
| 1874 | 0 | 0 | 0 | 0 | 0 | 0 | 0 | 0 |
| 1875 | 0 | 0 | 0 | 0 | 0 | 0 | 0 | 0 |
| 1876 | 0 | 0 | 0 | 0 | 0 | 0 | 0 | 0 |
| 1877 | 0 | 0 | 0 | 0 | 0 | 0 | 0 | 0 |
| 1878 | 0 | 0 | 0 | 0 | 0 | 0 | 0 | 0 |
| 1879 | 0 | 0 | 1 | 0 | 0 | 0 | 0 | 0 |
| 1880 | 0 | 0 | 0 | 0 | 0 | 0 | 0 | 0 |
| 1881 | 0 | 1 | 0 | 0 | 0 | 0 | 0 | 0 |
| 1882 | 0 | 0 | 1 | 0 | 0 | 0 | 0 | 0 |
| 1883 | 0 | 0 | 0 | 0 | 0 | 0 | 0 | 0 |
| 1884 | 0 | 0 | 2 | 0 | 0 | 0 | 0 | 0 |
| 1885 | 0 | 0 | 0 | 0 | 0 | 0 | 0 | 0 |
| 1886 | 0 | 0 | 0 | 0 | 0 | 0 | 0 | 0 |
| 1887 | 0 | 0 | 0 | 0 | 0 | 0 | 0 | 0 |
| 1888 | 0 | 0 | 0 | 0 | 0 | 0 | 0 | 0 |
| 1889 | 0 | 0 | 0 | 0 | 0 | 0 | 0 | 0 |
| 1890 | 0 | 0 | 0 | 0 | 0 | 0 | 0 | 0 |
| 1891 | 0 | 0 | 1 | 0 | 0 | 0 | 0 | 0 |
| 1892 | 0 | 0 | 1 | 0 | 0 | 0 | 0 | 0 |
| 1893 | 0 | 0 | 1 | 0 | 0 | 0 | 0 | 0 |
| 1894 | 0 | 0 | 0 | 0 | 0 | 0 | 0 | 0 |
| 1895 | 0 | 0 | 0 | 0 | 0 | 0 | 0 | 0 |
| 1896 | 0 | 0 | 1 | 1 | 0 | 0 | 0 | 0 |
| 1897 | 0 | 0 | 1 | 0 | 0 | 0 | 0 | 0 |
| 1898 | 0 | 0 | 1 | 0 | 0 | 0 | 0 | 0 |
| 1899 | 0 | 0 | 0 | 0 | 0 | 0 | 0 | 0 |
| 1900 | 0 | 0 | 0 | 0 | 0 | 0 | 0 | 0 |

---

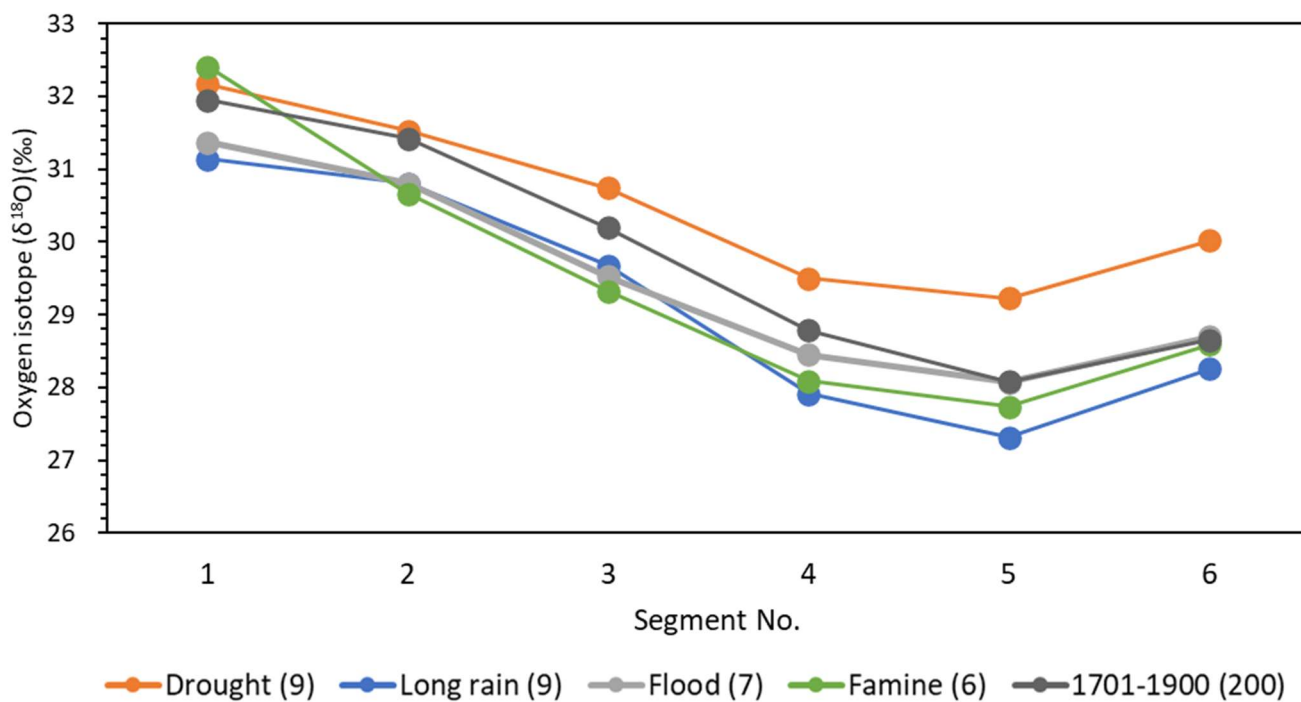

15 Figure S1 Intra-ring  $\delta^{18}\text{O}$  variation by disaster types. The mean and standard deviation of  $\delta^{18}\text{O}$  for the four types of disaster years and all years for the 1701–1900 period are indicated by solid dots and bars, respectively. Numbers in the parentheses in the legend indicate the number of years belonging to each disaster type. Years of each disaster type were extracted as years for which the disaster description is found in  $\geq 3$  titles of Town/City history.
